# Supplementary material for: Arctic–alpine blockfields in the northern Swedish Scandes: late Quaternary – not Neogene
Source: Copernicus journal article supplement (doi:10.5194/esurf-2-383-2014), 2014-07-21
Supplement: Supplementary file 1 [file esurf-2-383-2014-supplement.pdf]

Supplement of Earth Surf. Dynam., 2, 383–401, 2014  
<http://www.earth-surf-dynam.net/2/383/2014/>  
doi:10.5194/esurf-2-383-2014-supplement  
© Author(s) 2014. CC Attribution 3.0 License.

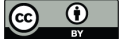

*Supplement of*

## **Arctic–alpine blockfields in the northern Swedish Scandes: late Quaternary – not Neogene**

**B. W. Goodfellow et al.**

*Correspondence to:* B. W. Goodfellow ([brad.goodfellow@natgeo.su.se](mailto:brad.goodfellow@natgeo.su.se))

**Table S1.** Blockfield observations along Alddasčorru, Duoptečohkka, and Tarfalatjårro transects.

| Transect and pit <sup>1</sup> | Location         | Elevation (m a.s.l.) | Slope (°) | Depth (m) | Periglacial sorting                     | Dominant slope process(es)        | Surface fine matrix (% area) | Pit fine matrix (% vol) | Distinctive section feature     | Water content               |
|-------------------------------|------------------|----------------------|-----------|-----------|-----------------------------------------|-----------------------------------|------------------------------|-------------------------|---------------------------------|-----------------------------|
| Alddasčorru 1                 | Summit           | 1538                 | <5        | 1.06      | Circles (40% surface area)              | Creep                             | 15                           | 5                       | Little fine matrix              | Wet                         |
| Alddasčorru 2                 | Upper slope      | 1500                 | 12        | 0.63      | Circles, few stripes (40% surface area) | Creep, some solifluction          | 15                           | 20                      | Thick gravel layer              | Very wet                    |
| Alddasčorru 3                 | Slope base       | 1460                 | 7         | 0.92      | Circles (50% surface area)              | Creep, some solifluction          | 15                           | 25                      | -                               | Very wet, saturated at base |
| Alddasčorru 4                 | Plateau          | 1450                 | <5        | 0.78      | Circles (90% surface area)              | Creep                             | 50                           | 10                      | Thick gravel layer              | Saturated                   |
| Duoptečohkka 1                | Summit           | 1330                 | <5        | 0.30      | None (frequent bedrock)                 | Creep                             | 5                            | 10                      | Shallow section                 | Wet                         |
| Duoptečohkka 2                | Upper slope      | 1300                 | 10        | 0.75      | Circles (50% surface area)              | Creep, some solifluction          | 5                            | 15                      | Little fine matrix              | Wet                         |
| Duoptečohkka 3                | Plateau          | 1290                 | 7         | 0.86      | Circles (90% area, poorly defined)      | Creep                             | 10                           | 20                      | -                               | Very wet                    |
| Duoptečohkka 4                | Lower slope      | 1240                 | 14        | 0.94      | Stripes, some circles (50% area)        | Solifluction, surface wash, creep | 10                           | 10                      | Deep, dominated by gravel       | Damp                        |
| Duoptečohkka 5                | Lower slope      | 1200                 | 14        | 1.30      | Stripes, some circles (25% area)        | Solifluction, surface wash, creep | 10                           | 5                       | Deep, dominated by gravel       | Damp                        |
| Tarfalatjårro 1               | Summit           | 1626                 | <5        | 1.30      | Circles (30% area, poorly defined)      | Creep                             | 10                           | 5                       | Little fine matrix              | Damp                        |
| Tarfalatjårro 2               | Summit           | 1626                 | <5        | 1.30      | Circles (30% area, poorly defined)      | Creep                             | 10                           | 15                      | -                               | Wet                         |
| Tarfalatjårro 3               | Summit/<br>Slope | 1623                 | 8         | 1.18      | Circles (20% area, poorly defined)      | Creep                             | 10                           | 20                      | More fine matrix than at summit | Wet                         |
| Tarfalatjårro 4               | Slope            | 1586                 | 6         | 0.71      | Circles (30% area, poorly defined)      | Creep                             | 10                           | 20                      | -                               | Damp                        |
| Tarfalatjårro 5               | Slope            | 1572                 | 6         | 0.65      | Circles (30% area, poorly defined)      | Creep, some solifluction          | 20                           | 25                      | -                               | Wet                         |
| Tarfalatjårro 9               | Saddle           | 1553                 | <5        | 1.10      | Circles (90% surface area)              | Deposition, surface wash, creep   | 30                           | 30                      | Abundant fine matrix            | Very wet, saturated at base |

<sup>1</sup> Alddasčorru pits 5–10 and Duoptečohkka pits 8–10 are excluded because they were not excavated into blockfields. Duoptečohkka pits 6–7 and Tarfalatjårro pits 6–8 are excluded because they were not excavated to maximum depths accessible by hand tools.
